# Supplementary material
Source: PubMed Central journal article supplement (PMC2606004)
Supplement: M806660200_1.pdf [file M806660200_1.pdf]

**SUPPLEMENTAL DATA.**

**Table 2**  
**Array Validation**

| <b>Gene</b>                     | <b>Gene Array</b> | <b>qRT-PCR</b>      |
|---------------------------------|-------------------|---------------------|
| <b>1. Kcnl2</b>                 | <b>0.11</b>       | <b>0.21 ± 0.01</b>  |
| <b>2. Sema3a</b>                | <b>2.27</b>       | <b>3.71 ± 0.34</b>  |
| <b>3. Periostatin</b>           | <b>13.6</b>       | <b>13.75 ± 0.95</b> |
| <b>4. Wt1 Wilm</b>              | <b>0.7</b>        | <b>0.38 ± 0.03</b>  |
| <b>5. Gap43</b>                 | <b>0.8</b>        | <b>0.48 ± 0.039</b> |
| <b>6. Pim3</b>                  | <b>0.6</b>        | <b>0.51 ± 0.20</b>  |
| <b>7. MAPK8</b>                 | <b>1.4</b>        | <b>1.28 ± 0.26</b>  |
| <b>8. PI3K</b>                  | <b>0.6</b>        | <b>0.42 ± 0.19</b>  |
| <b>9. PP2A regulatory alpha</b> | <b>1.3</b>        | <b>1.16 ± 0.14</b>  |
| <b>10. PP2A regulatory beta</b> | <b>1.3</b>        | <b>1.82 ± 0.41</b>  |
| <b>11. Calmodulin</b>           | <b>1.4</b>        | <b>1.25 ± 0.20</b>  |
| <b>12. P70S6 kinase</b>         | <b>0.7</b>        | <b>0.65 ± 0.09</b>  |
